# Supplementary material
Source: PubMed Central journal article supplement (PMC5906746)
Supplement: mmc8.pdf [file mmc8.pdf]

# Supplemental Figure 8

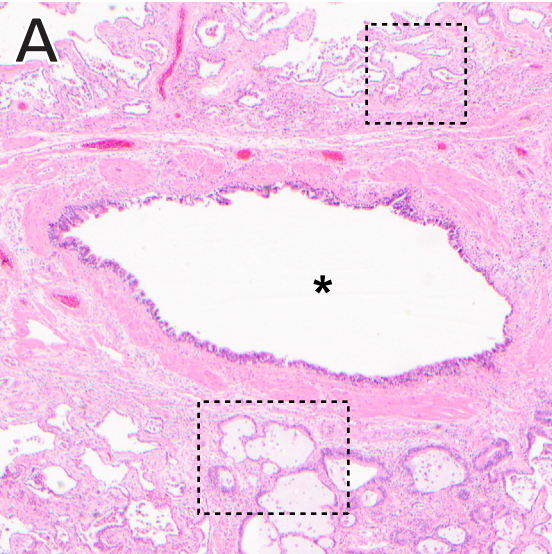

H&E (Case 1 Explant)

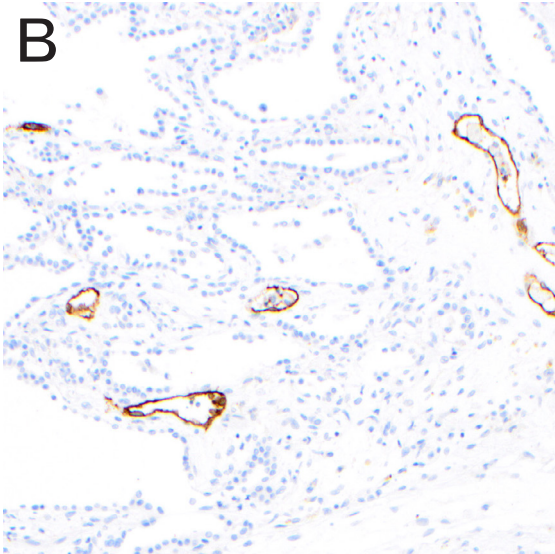

Podoplanin (D2-40)

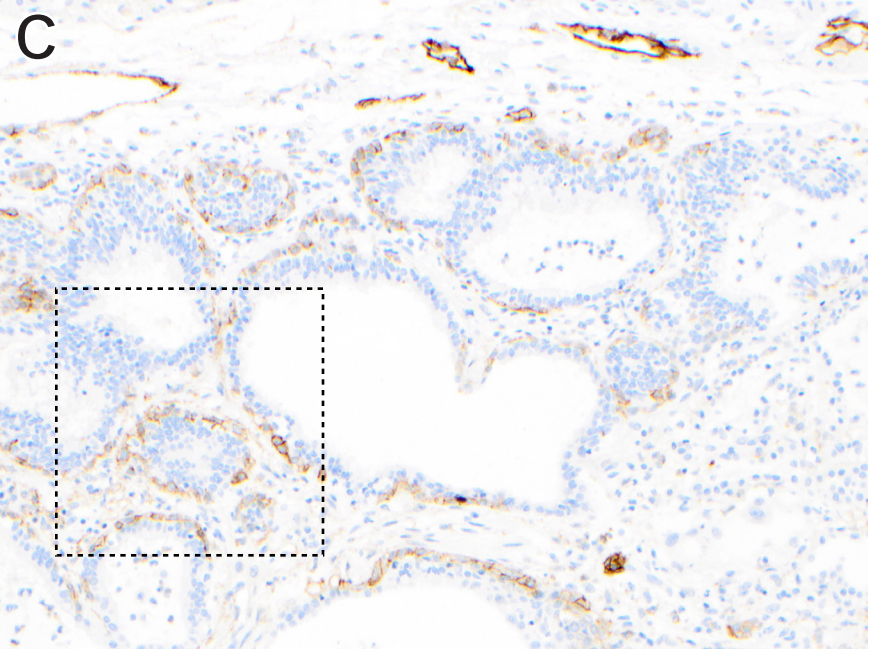

Podoplanin (D2-40, Case 1 Explant)

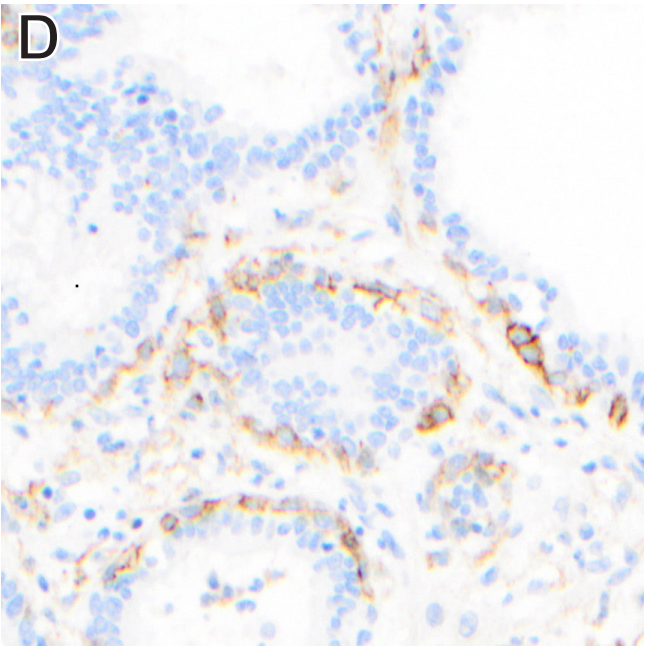

Podoplanin (D2-40)

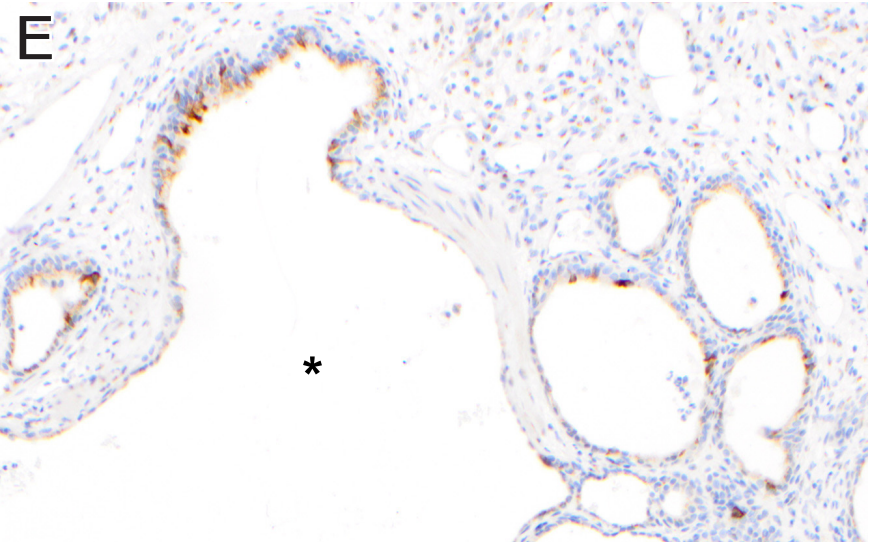

Muc5ac (Case 2)

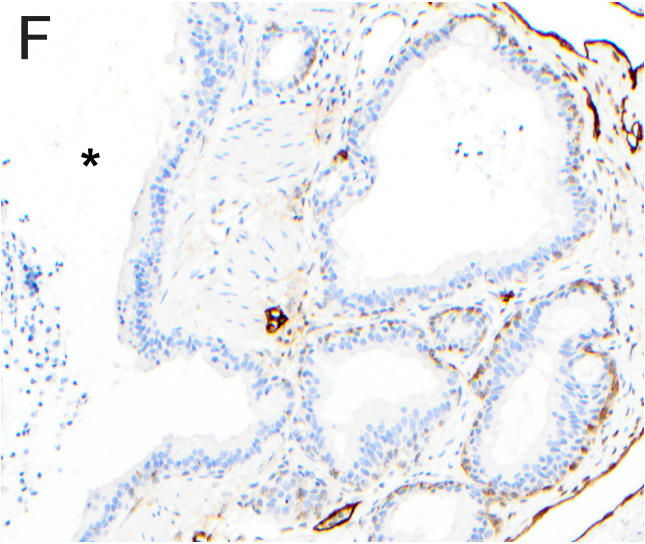

Podoplanin (D2-40, Case 2)
