# Supplementary material
Source: PubMed Central journal article supplement (PMC5906746)

Supplemental Figure 1

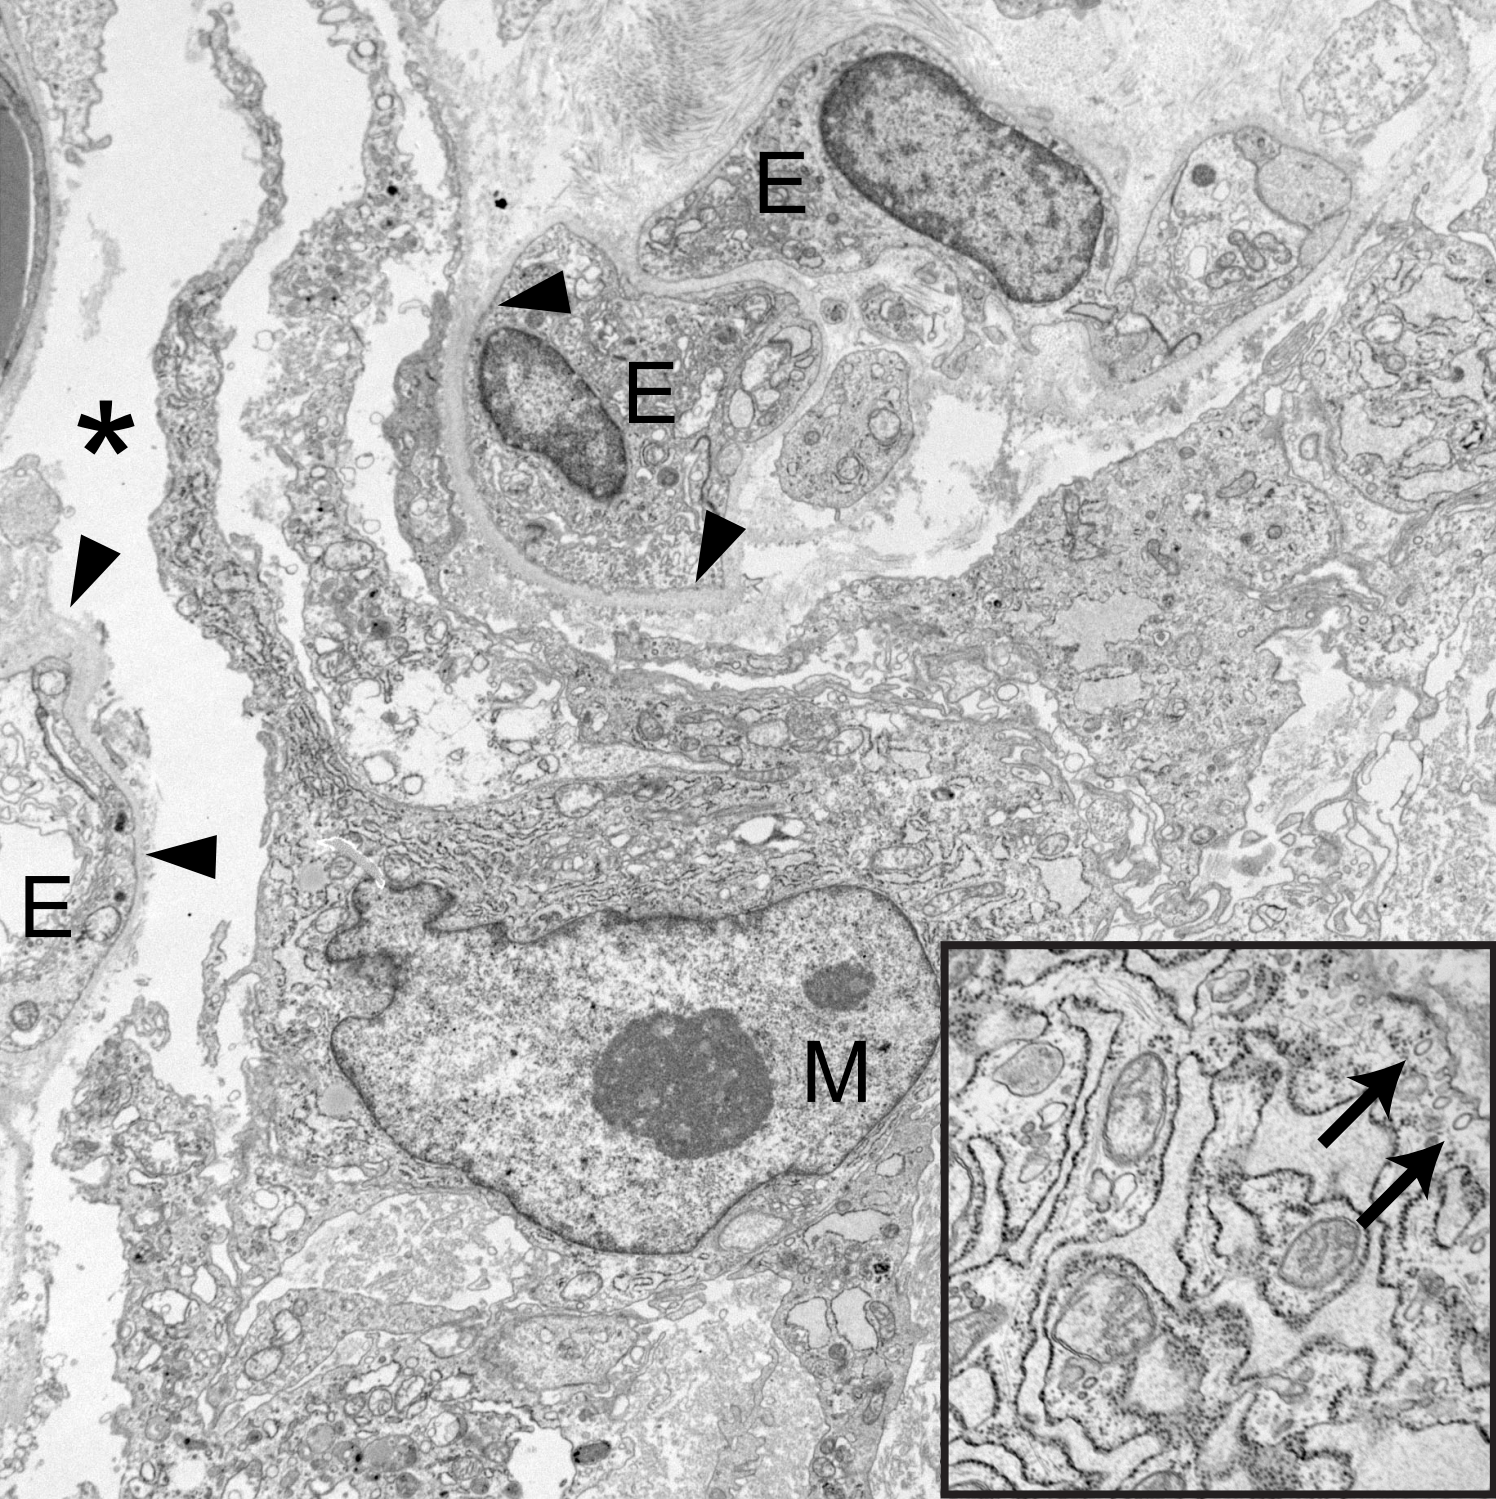

Supplement: mmc1.pdf [file mmc1.pdf]

# Supplemental Figure 2

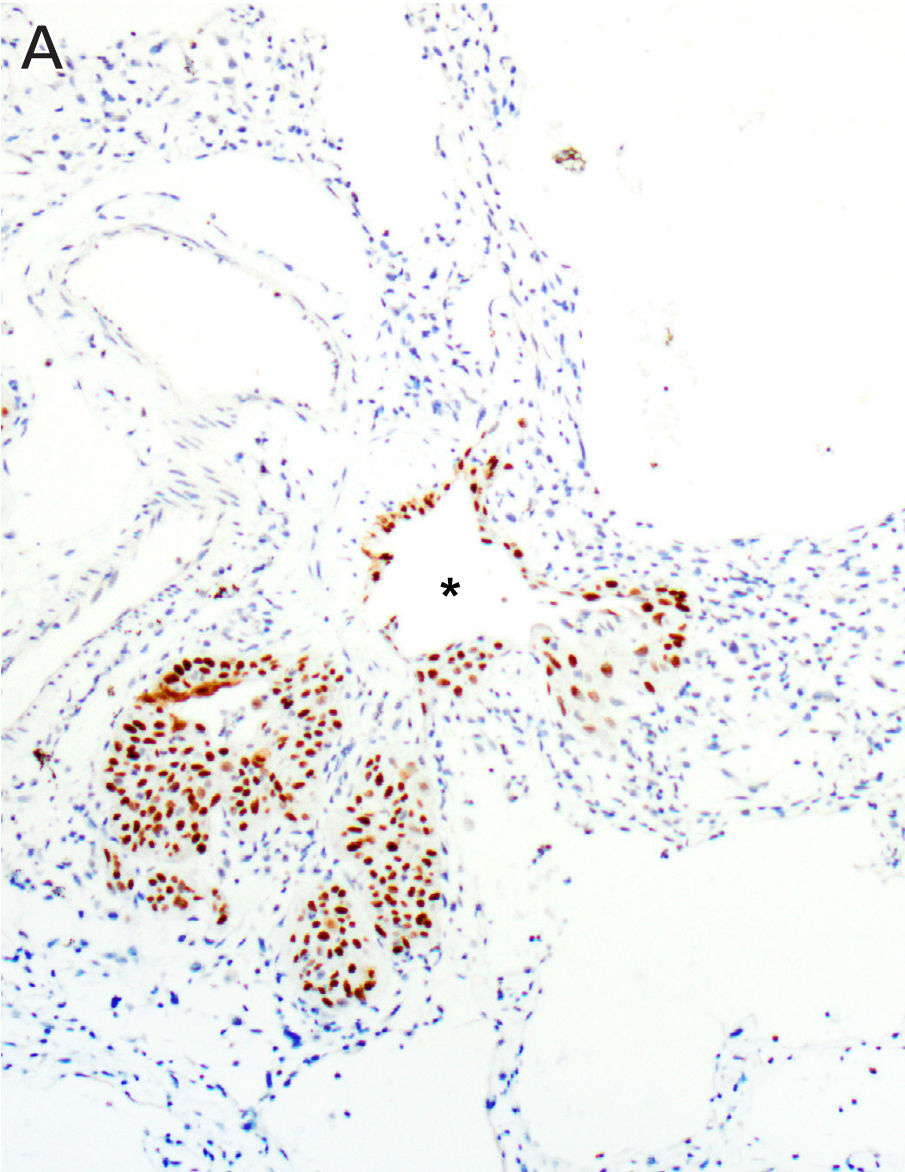

TTF1

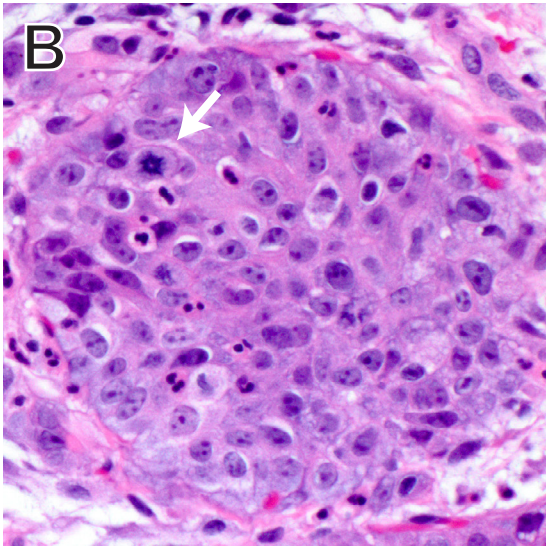

H&E

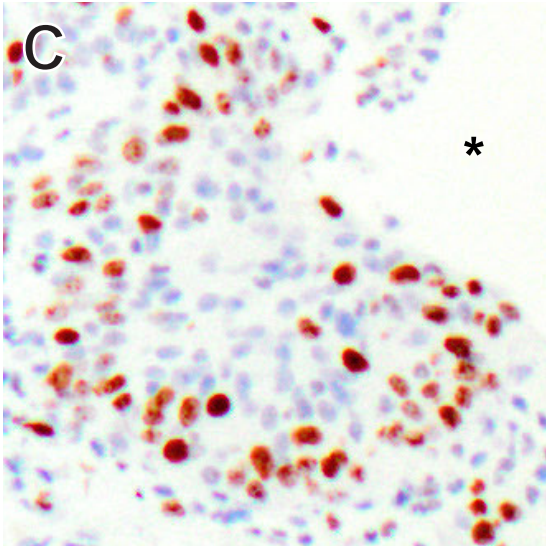

Ki-67

Supplement: mmc2.pdf [file mmc2.pdf]

# Supplemental Figure 3

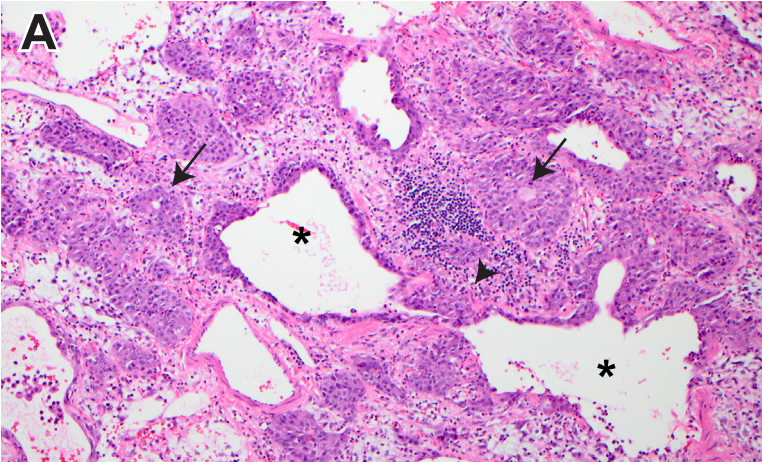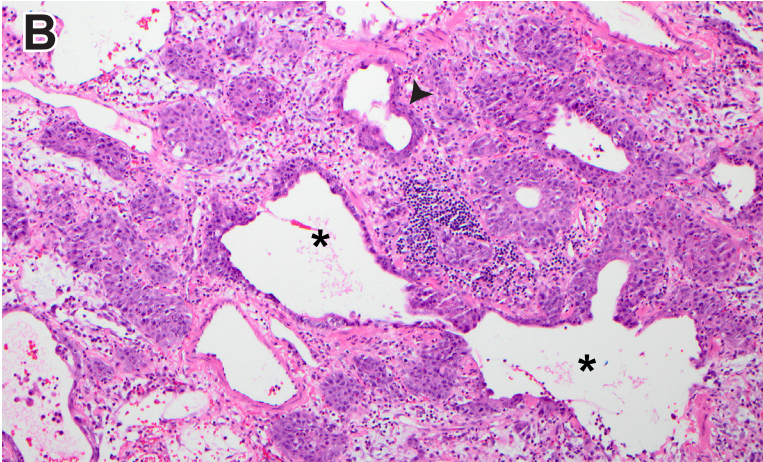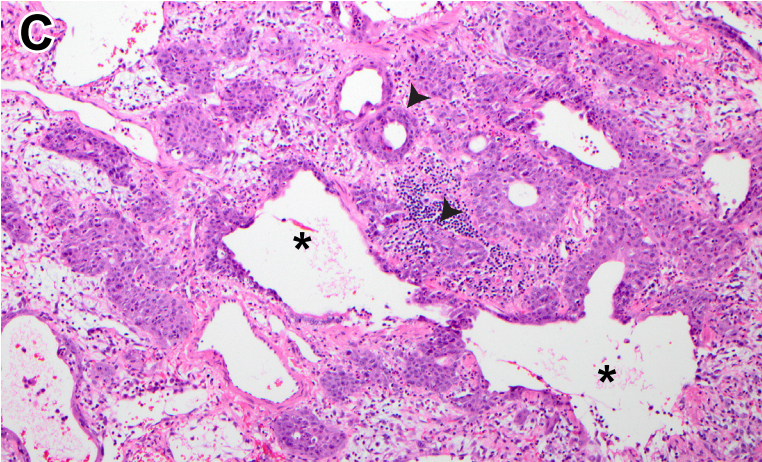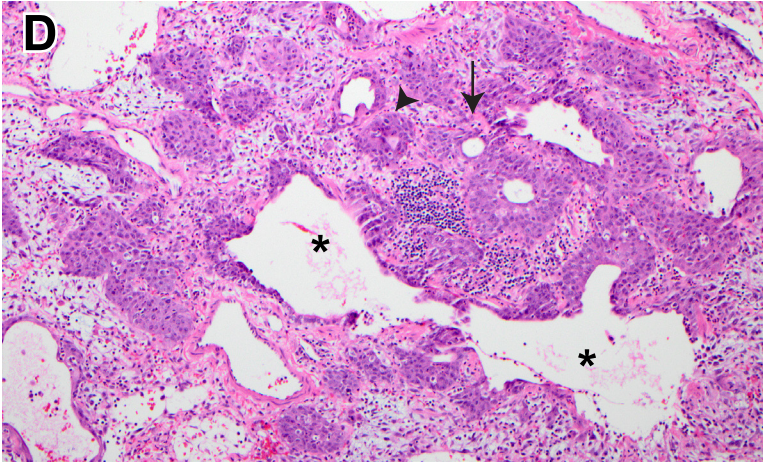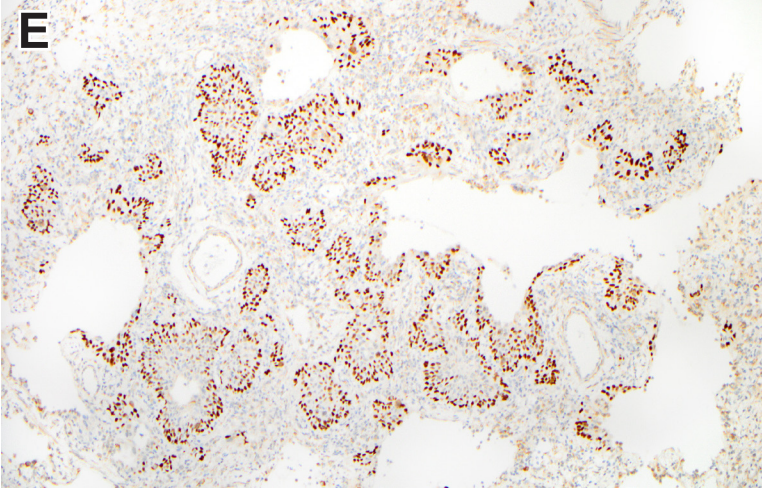

p63

Supplement: mmc3.pdf [file mmc3.pdf]

# Supplemental Figure 4

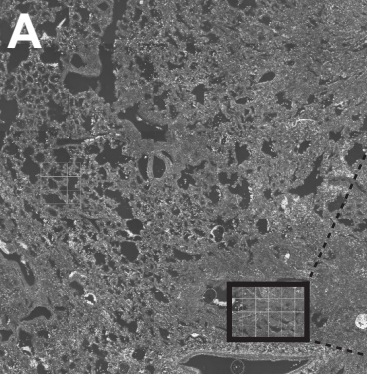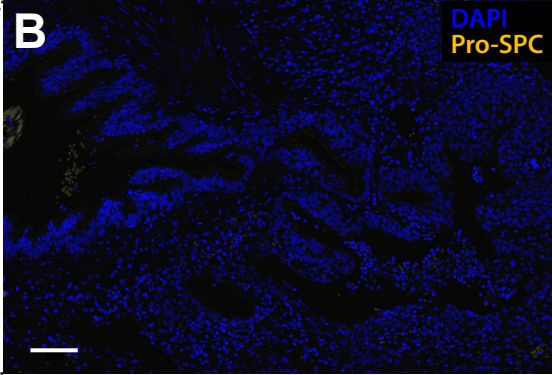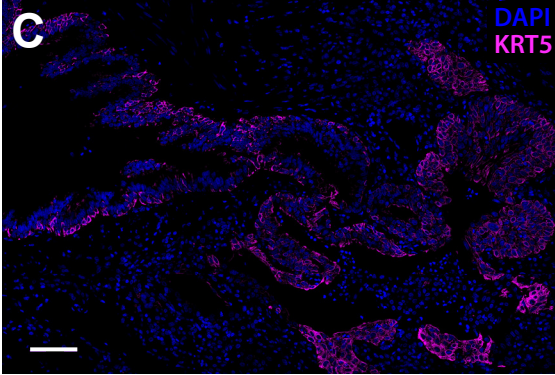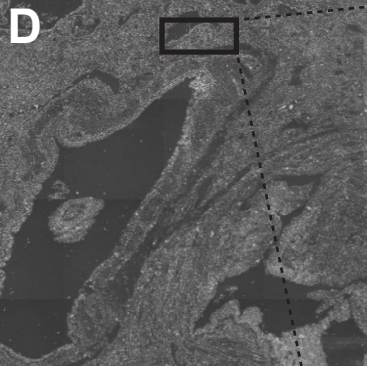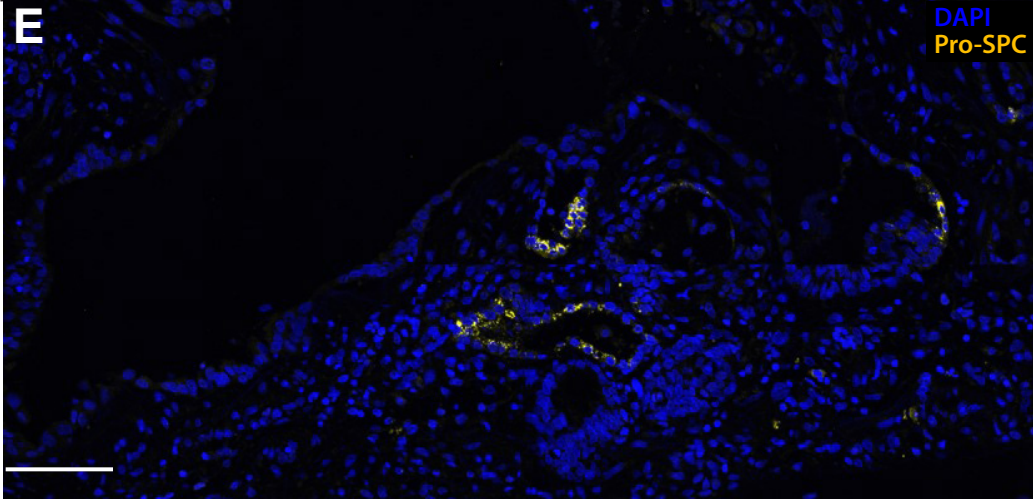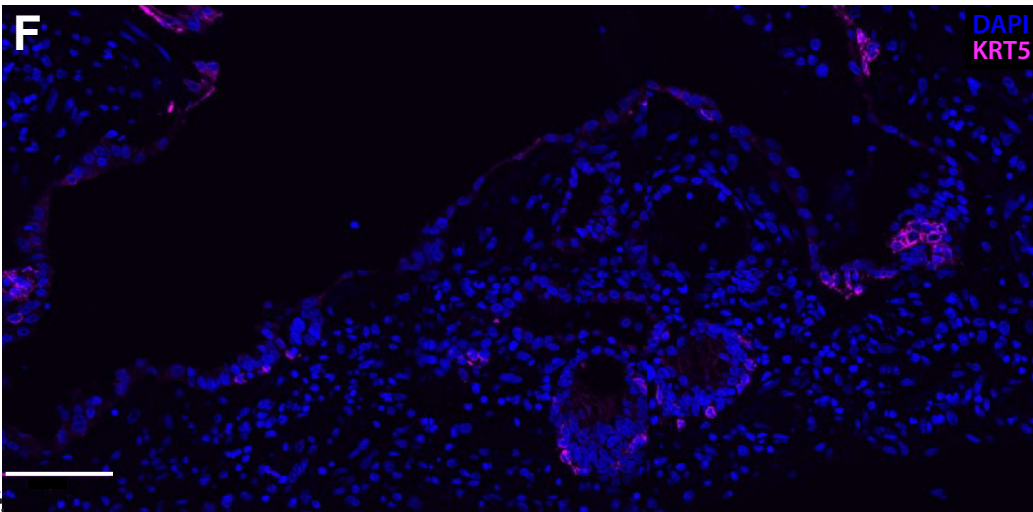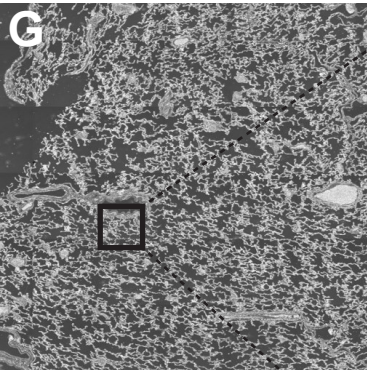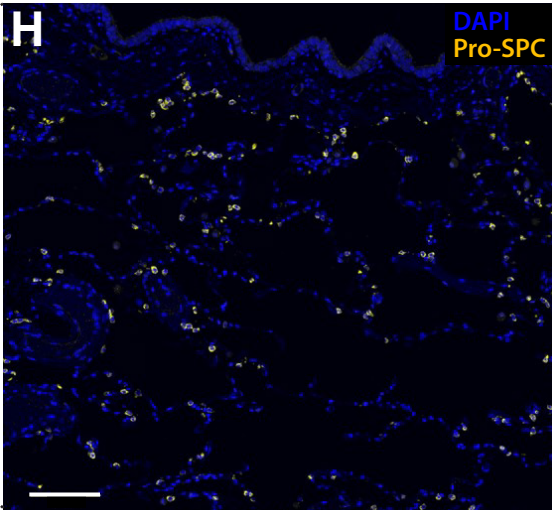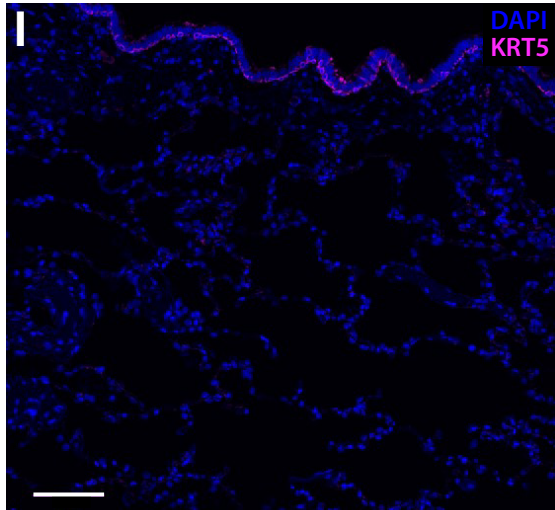

Supplement: mmc4.pdf [file mmc4.pdf]

# Supplemental Figure 5

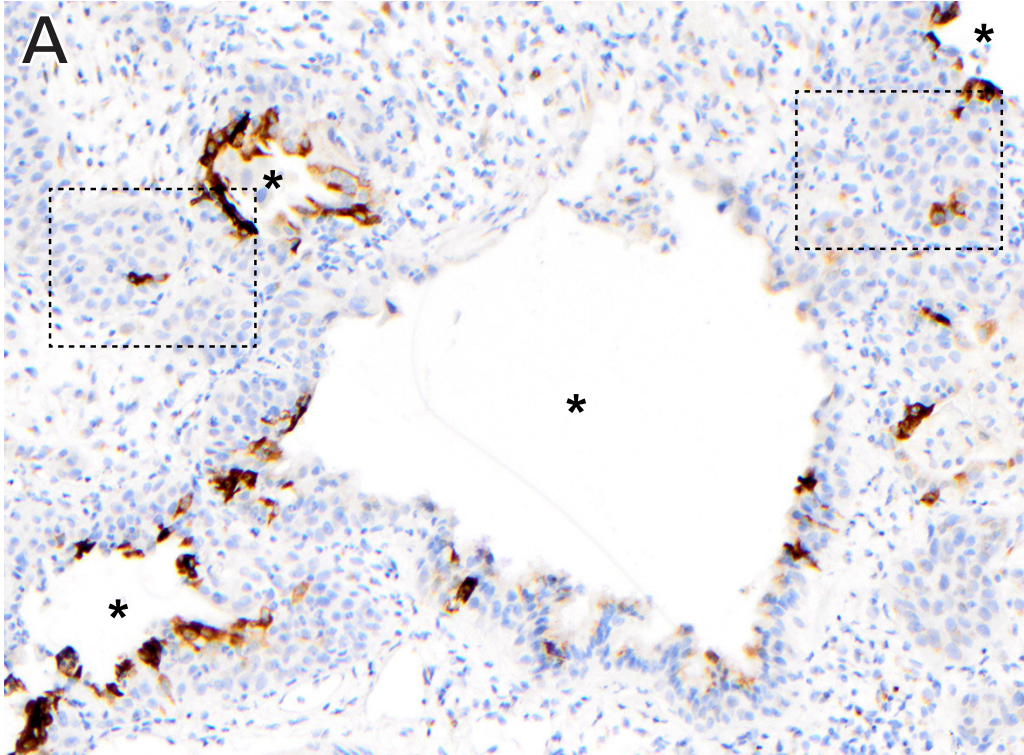

Muc5ac

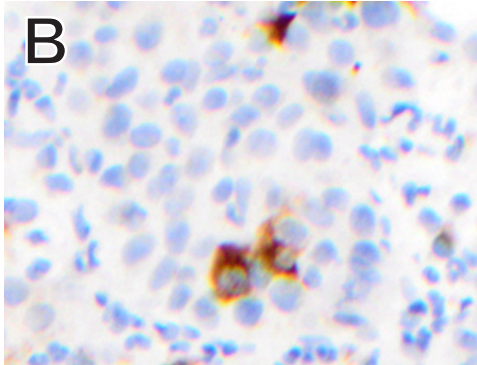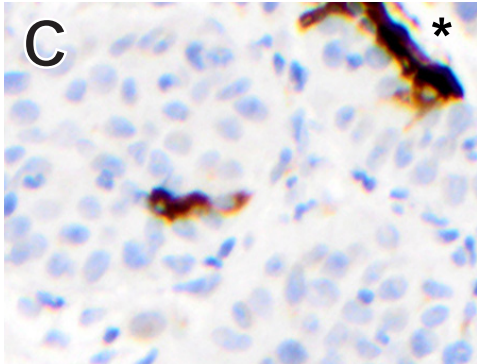

Muc5ac

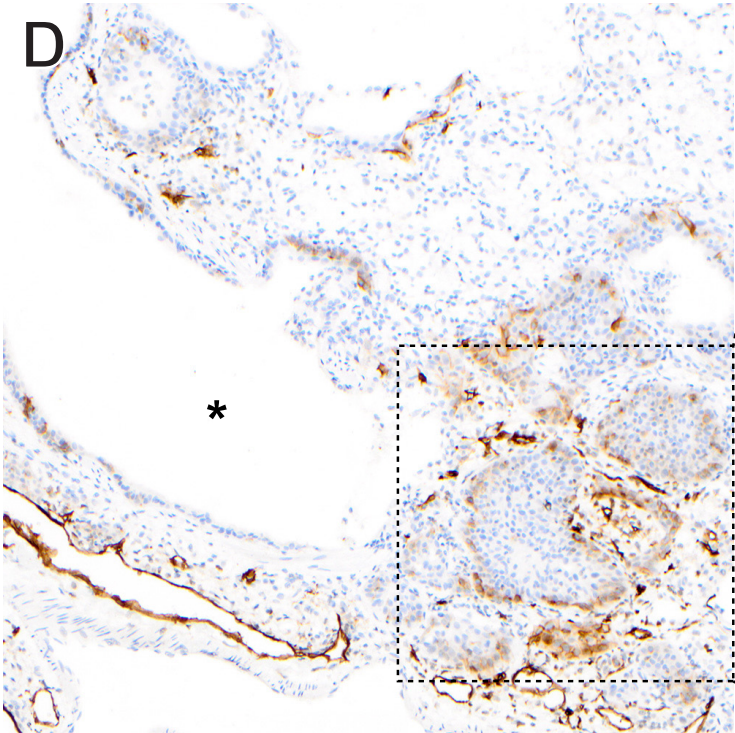

Podoplanin (D2-40)

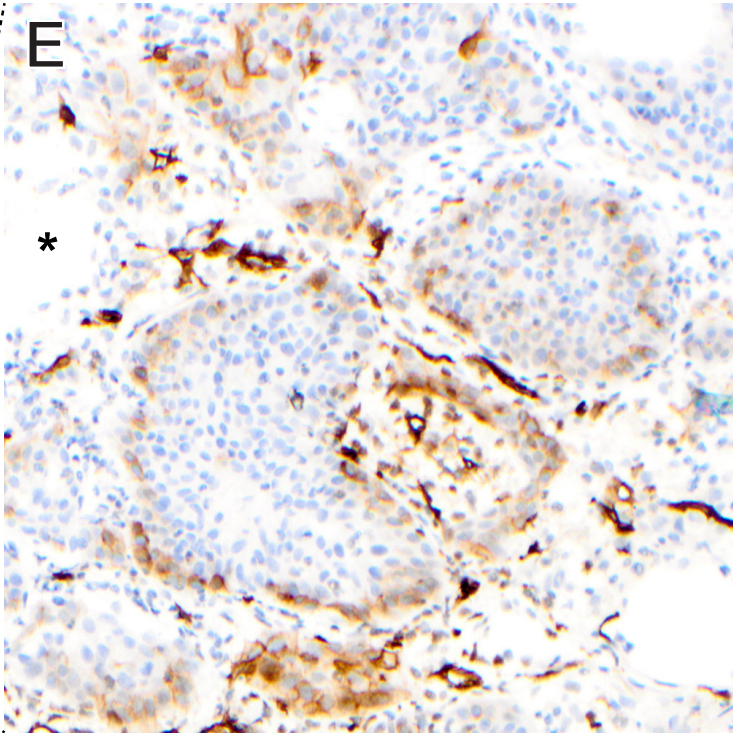

Podoplanin (D2-40)

Supplement: mmc5.pdf [file mmc5.pdf]

# Supplemental Figure 6

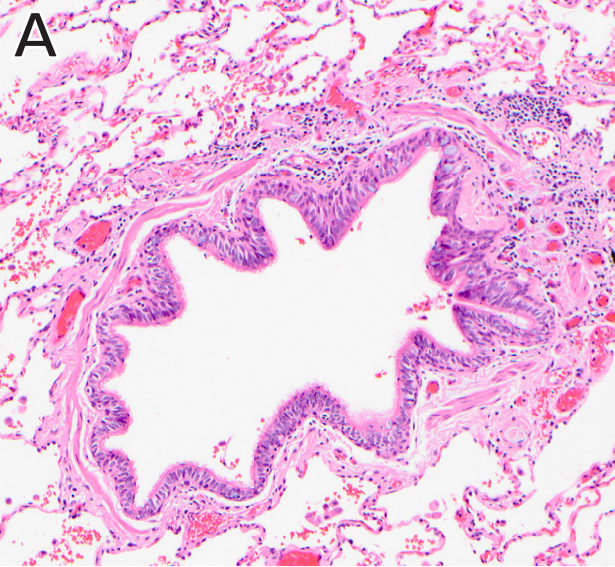

H&E

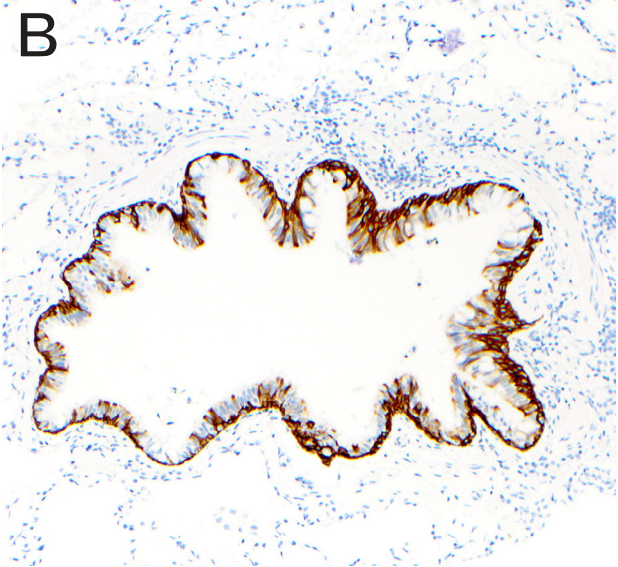

Keratin 5/6

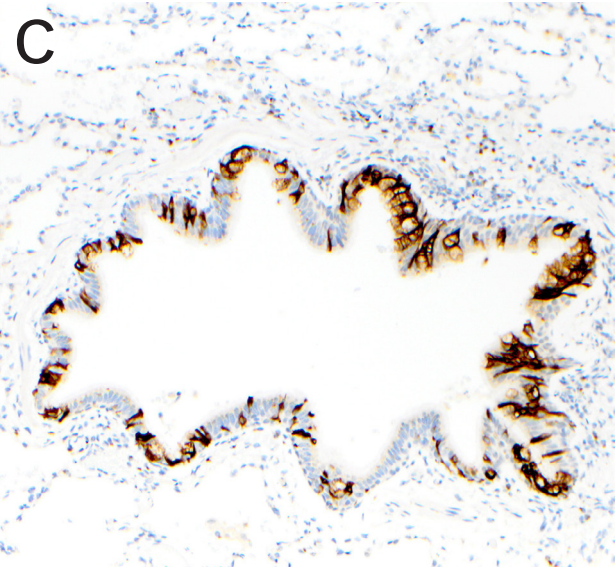

Muc5ac

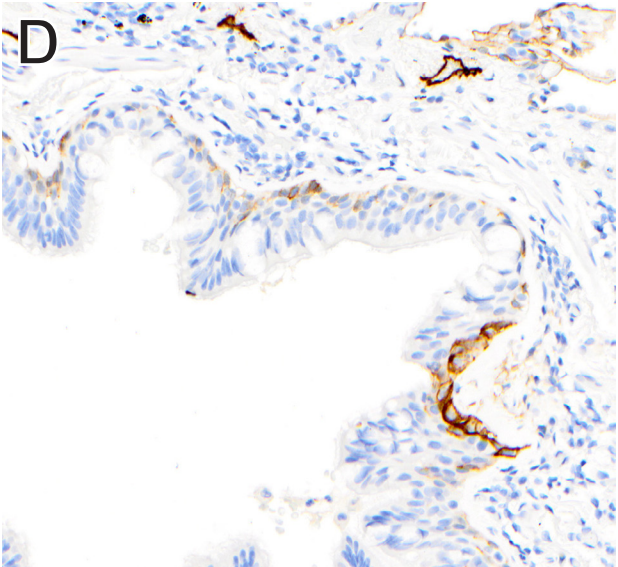

Podoplanin (D2-40)

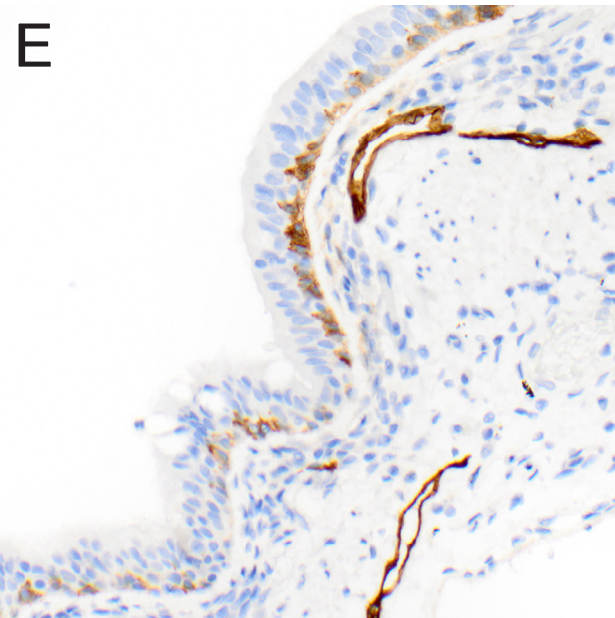

Podoplanin (D2-40)

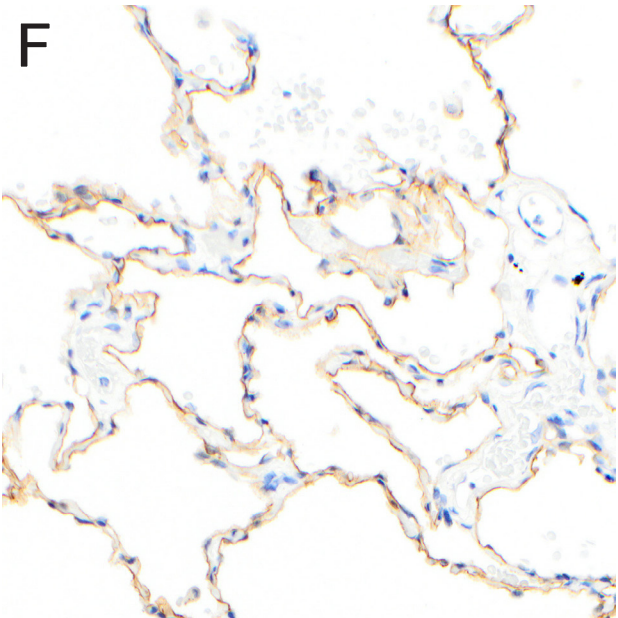

Podoplanin (D2-40)

Supplement: mmc6.pdf [file mmc6.pdf]

# Supplemental Figure 7

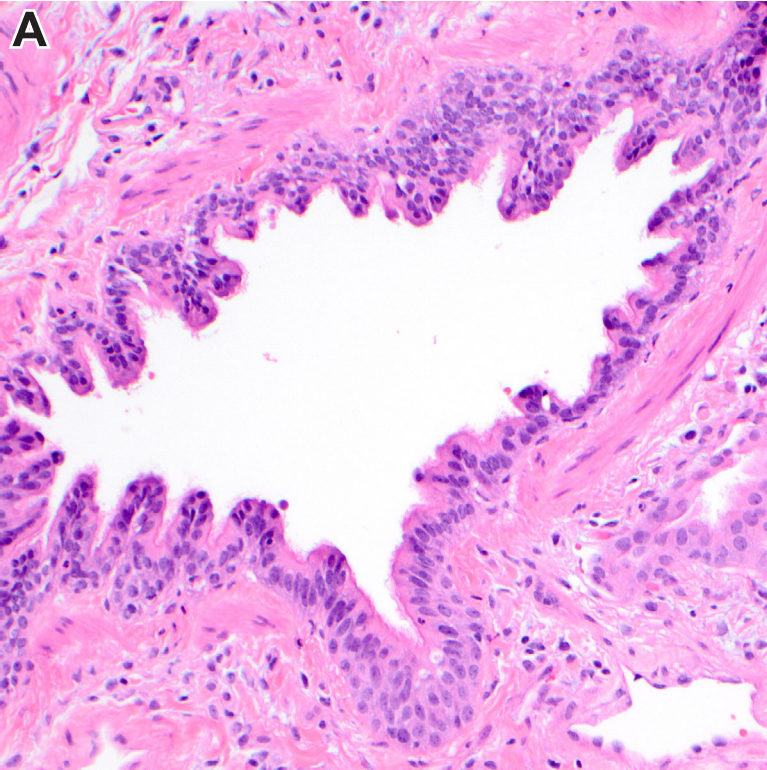

Case 1, biopsy

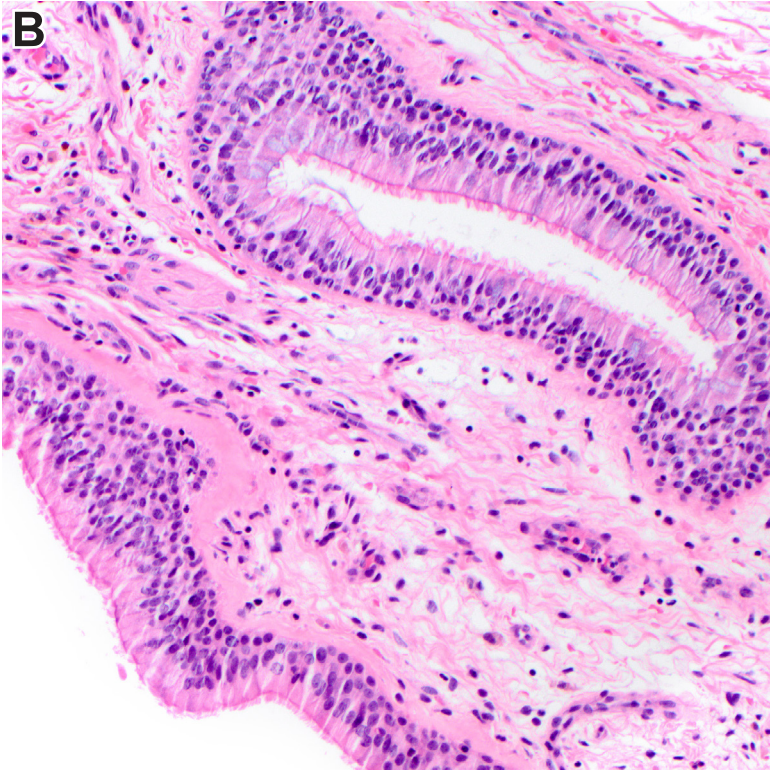

Case 1, explant

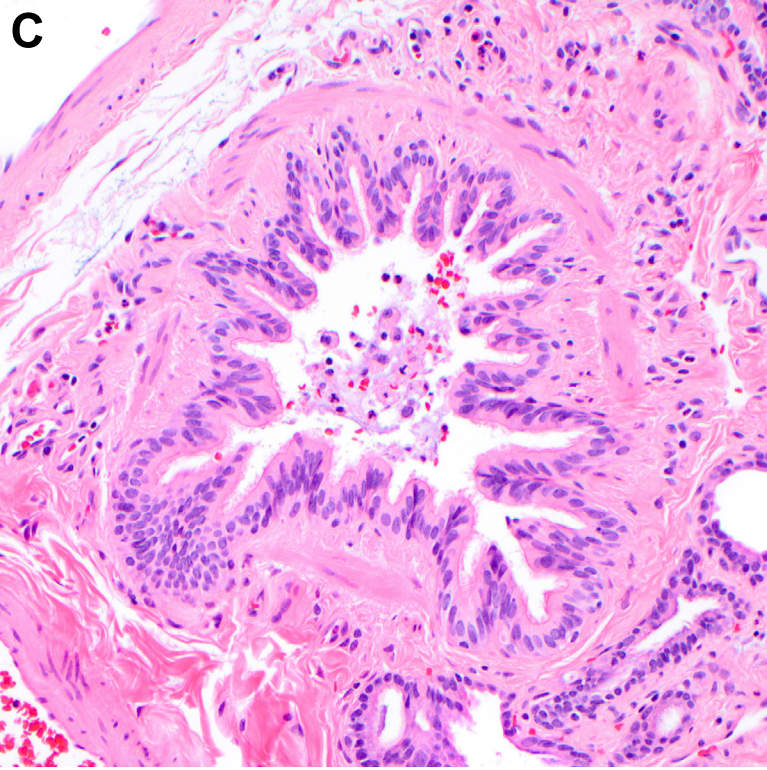

Case 2 (biopsy)

Supplement: mmc7.pdf [file mmc7.pdf]

# Supplemental Figure 9

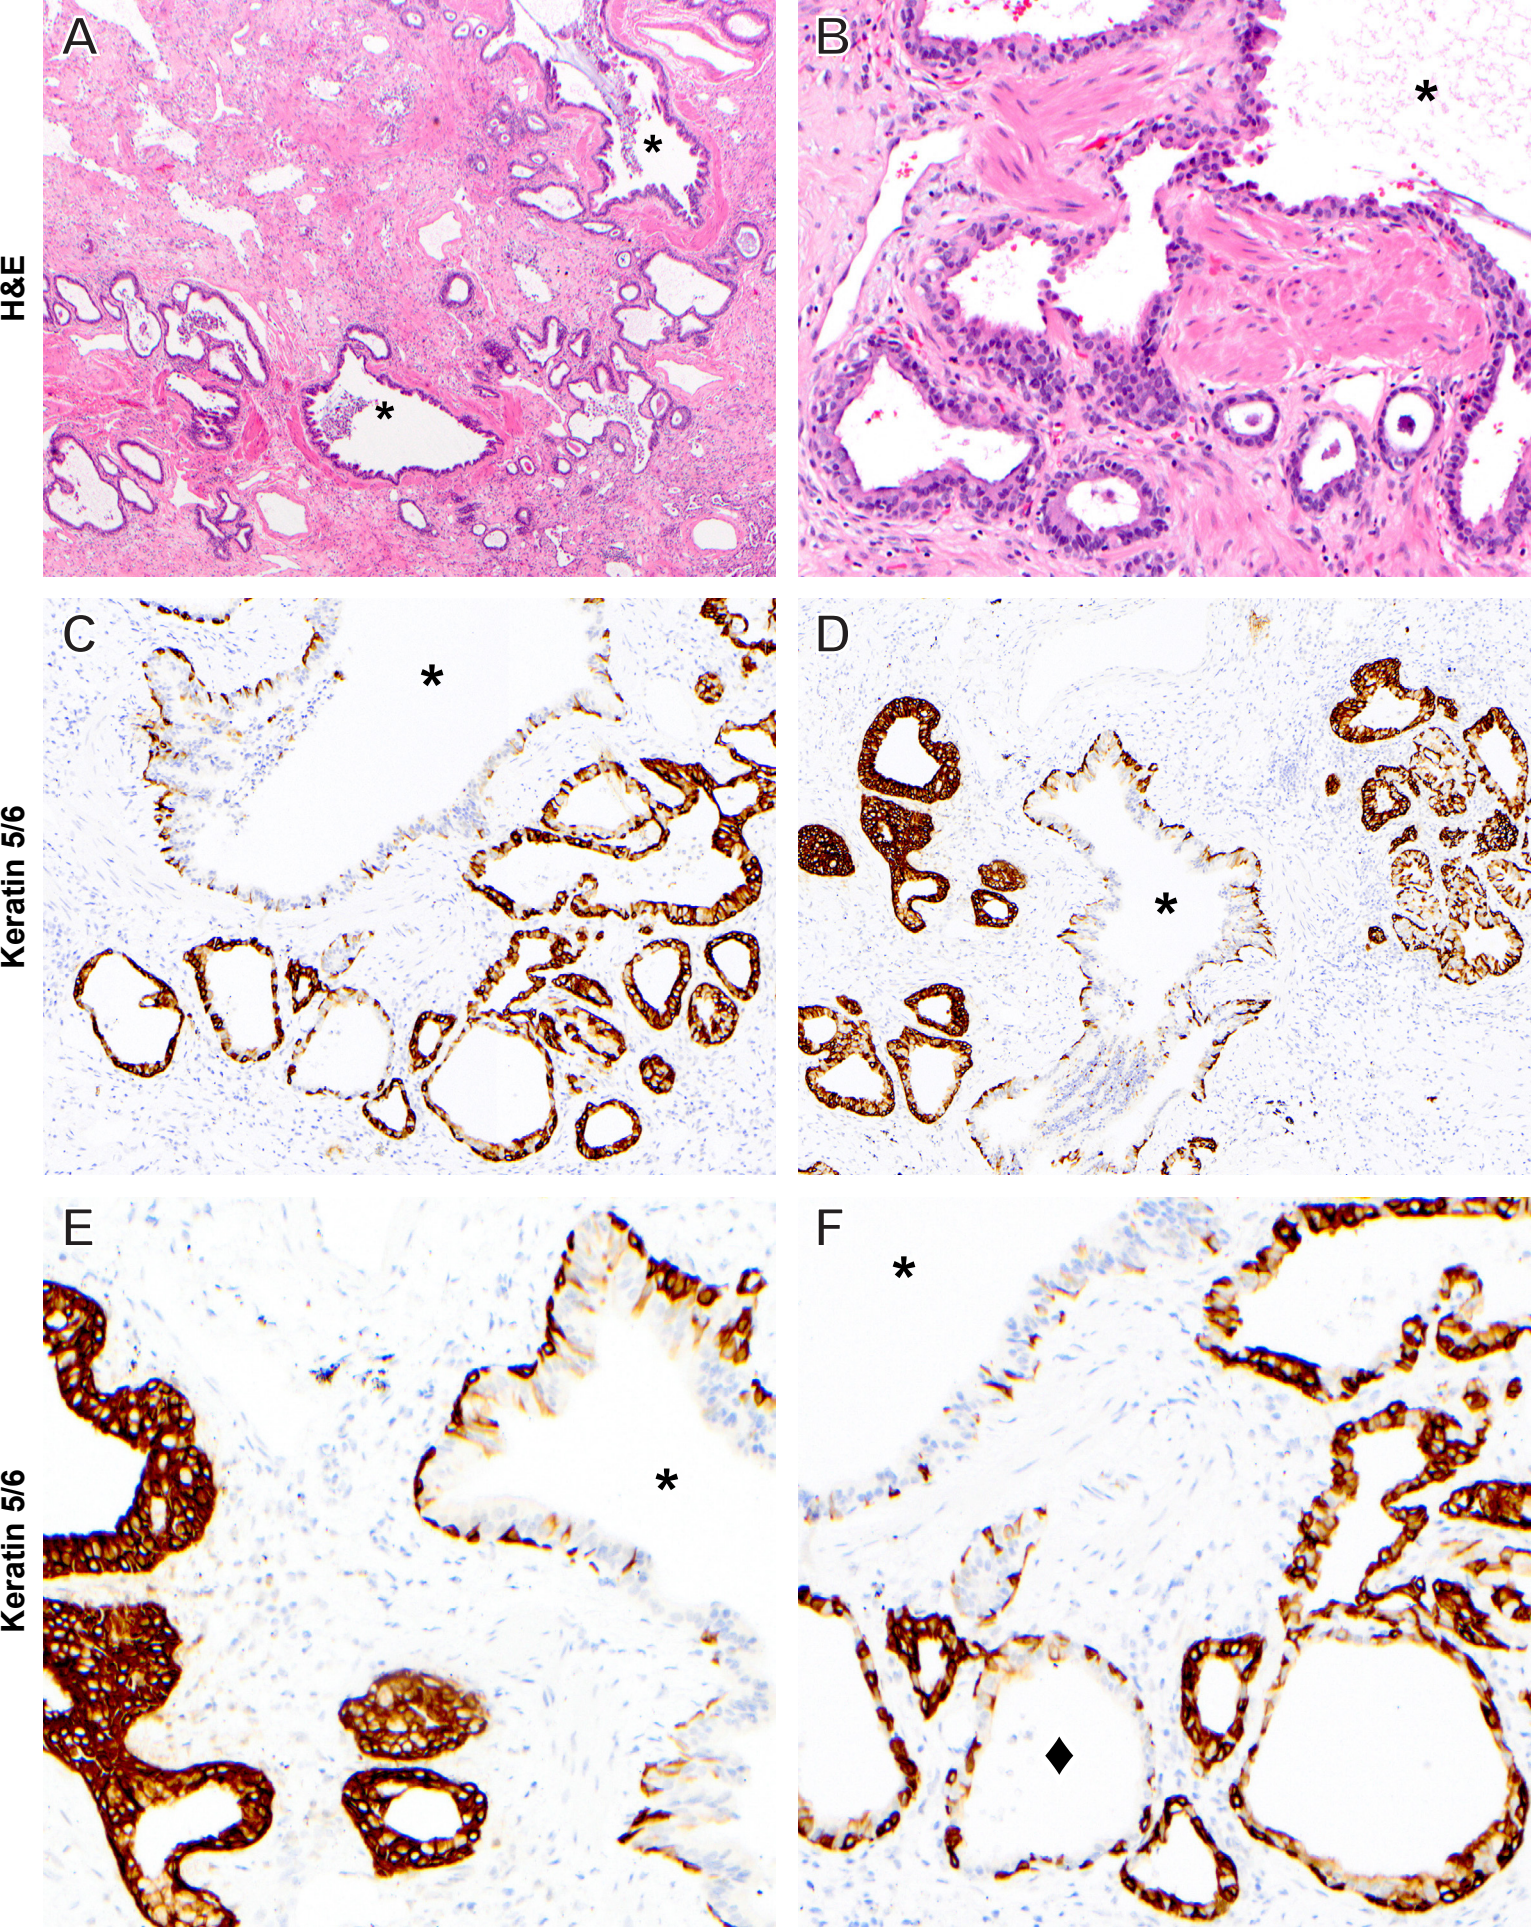

Supplement: mmc9.pdf [file mmc9.pdf]
